# Supplementary material
Source: bioRxiv or medRxiv preprint supplement (https://www.medrxiv.org/highwire/filestream/73613/field_highwire_adjunct_files/3/2020.03.12.20034165-4.pdf)
Supplement: Supplementary file [file 2020.03.12.20034165-4.pdf]

## Supplementary Table 4

All 61 genes from the POP landscape that were differentially expressed between POP and non-POP tissues of 12 premenopausal women with POP (Supplementary Table 3)

**P** = significant P value after correction

| Gene             | Link with POP                   | FC    | P value         | Corr P value    |
|------------------|---------------------------------|-------|-----------------|-----------------|
| <i>AKR1C1</i>    | Exome chip (Table 2)            | 1,55  | <b>1,74E-04</b> | <b>7,01E-03</b> |
| <i>FBLN5</i>     | Other evidence (Suppl. Table 1) | -1,41 | <b>2,60E-04</b> | <b>8,56E-03</b> |
| <i>PLAUR</i>     | Other evidence (Suppl. Table 1) | 1,61  | <b>1,36E-03</b> | <b>2,25E-02</b> |
| <i>VIM</i>       | Other evidence (Suppl. Table 1) | 1,20  | <b>2,88E-03</b> | <b>3,59E-02</b> |
| <i>RAD52</i>     | Exome chip (Table 2)            | -1,16 | <b>3,12E-03</b> | <b>3,77E-02</b> |
| <i>HIF1A</i>     | Other evidence (Suppl. Table 1) | 1,19  | 1,01E-02        | 7,96E-02        |
| <i>ELN</i>       | Other evidence (Suppl. Table 1) | 1,27  | 1,19E-02        | 8,82E-02        |
| <i>ECM1</i>      | Other evidence (Suppl. Table 1) | 1,26  | 1,28E-02        | 9,15E-02        |
| <i>RRM2</i>      | Other evidence (Suppl. Table 1) | -1,14 | 1,55E-02        | 1,03E-01        |
| <i>ARHGEF19</i>  | Other evidence (Suppl. Table 1) | -1,21 | 1,56E-02        | 1,04E-01        |
| <i>ITGB1</i>     | Other evidence (Suppl. Table 1) | 1,16  | 1,78E-02        | 1,12E-01        |
| <i>LOXL1</i>     | Other evidence (Suppl. Table 1) | 1,22  | 3,71E-02        | 1,76E-01        |
| <i>LAIR2</i>     | Other evidence (Suppl. Table 1) | -1,10 | 5,39E-02        | 2,19E-01        |
| <i>SCUBE2</i>    | Other evidence (Suppl. Table 1) | -1,51 | 7,87E-02        | 2,73E-01        |
| <i>MRPL35</i>    | Other evidence (Suppl. Table 1) | -1,07 | 9,50E-02        | 3,05E-01        |
| <i>LILRA1</i>    | Other evidence (Suppl. Table 1) | 1,07  | 9,53E-02        | 3,06E-01        |
| <i>METAP1</i>    | Other evidence (Suppl. Table 1) | -1,08 | 9,54E-02        | 3,06E-01        |
| <i>TNFRSF10C</i> | Other evidence (Suppl. Table 1) | 1,14  | 1,01E-01        | 3,17E-01        |
| <i>AKR1D1</i>    | Other evidence (Suppl. Table 1) | 1,06  | 1,02E-01        | 3,19E-01        |
| <i>TFAM</i>      | Other evidence (Suppl. Table 1) | -1,07 | 1,04E-01        | 3,22E-01        |
| <i>TNFSF10</i>   | Other evidence (Suppl. Table 1) | -1,13 | 1,04E-01        | 3,22E-01        |
| <i>GPX1</i>      | Other evidence (Suppl. Table 1) | 1,07  | 1,10E-01        | 3,32E-01        |
| <i>MMP1</i>      | Other evidence (Suppl. Table 1) | 1,14  | 1,65E-01        | 4,20E-01        |
| <i>ACN9</i>      | Other evidence (Suppl. Table 1) | -1,07 | 1,74E-01        | 4,32E-01        |
| <i>ANKLE2</i>    | Other evidence (Suppl. Table 1) | -1,04 | 1,81E-01        | 4,40E-01        |
| <i>COL1A1</i>    | Other evidence (Suppl. Table 1) | -1,29 | 2,03E-01        | 4,67E-01        |
| <i>EMILIN1</i>   | Other evidence (Suppl. Table 1) | -1,11 | 2,10E-01        | 4,77E-01        |
| <i>CASP3</i>     | Other evidence (Suppl. Table 1) | 1,05  | 2,21E-01        | 4,90E-01        |
| <i>COL18A1</i>   | Other evidence (Suppl. Table 1) | 1,11  | 2,64E-01        | 5,39E-01        |
| <i>NACA2</i>     | Other evidence (Suppl. Table 1) | -1,04 | 3,10E-01        | 5,87E-01        |
| <i>MMP9</i>      | Other evidence (Suppl. Table 1) | -1,18 | 3,25E-01        | 6,02E-01        |
| <i>ESR1</i>      | Other evidence (Suppl. Table 1) | -1,10 | 3,37E-01        | 6,13E-01        |
| <i>LOX</i>       | Other evidence (Suppl. Table 1) | 1,15  | 3,41E-01        | 6,16E-01        |
| <i>TGFB1</i>     | Other evidence (Suppl. Table 1) | 1,04  | 3,53E-01        | 6,27E-01        |
| <i>LAMC1</i>     | Other evidence (Suppl. Table 1) | 1,04  | 3,65E-01        | 6,39E-01        |
| <i>HLA-DQA1</i>  | Other evidence (Suppl. Table 1) | -1,14 | 3,66E-01        | 6,40E-01        |
| <i>FASTKD1</i>   | Other evidence (Suppl. Table 1) | -1,05 | 3,99E-01        | 6,70E-01        |
| <i>NOP56</i>     | Other evidence (Suppl. Table 1) | -1,02 | 4,01E-01        | 6,72E-01        |

|                 |                                 |       |          |          |
|-----------------|---------------------------------|-------|----------|----------|
| <i>WNK1</i>     | Other evidence (Suppl. Table 1) | 1,03  | 4,02E-01 | 6,72E-01 |
| <i>ATP12A</i>   | Other evidence (Suppl. Table 1) | 1,03  | 4,22E-01 | 6,89E-01 |
| <i>SERPINA1</i> | Other evidence (Suppl. Table 1) | -1,07 | 4,31E-01 | 6,95E-01 |
| <i>PARP1</i>    | Other evidence (Suppl. Table 1) | 1,04  | 4,35E-01 | 6,98E-01 |
| <i>STYK1</i>    | Other evidence (Suppl. Table 1) | -1,06 | 4,42E-01 | 7,04E-01 |
| <i>YWHAB</i>    | Other evidence (Suppl. Table 1) | 1,02  | 5,47E-01 | 7,83E-01 |
| <i>MMP2</i>     | Other evidence (Suppl. Table 1) | -1,07 | 5,57E-01 | 7,89E-01 |
| <i>TIMP1</i>    | Other evidence (Suppl. Table 1) | 1,04  | 5,83E-01 | 8,06E-01 |
| <i>RAGE</i>     | Other evidence (Suppl. Table 1) | -1,03 | 6,28E-01 | 8,34E-01 |
| <i>COL3A1</i>   | Other evidence (Suppl. Table 1) | -1,08 | 6,32E-01 | 8,36E-01 |
| <i>PLG</i>      | Other evidence (Suppl. Table 1) | -1,02 | 6,75E-01 | 8,61E-01 |
| <i>HLA-DQB1</i> | Other evidence (Suppl. Table 1) | -1,03 | 7,33E-01 | 8,90E-01 |
| <i>MMP3</i>     | Other evidence (Suppl. Table 1) | -1,02 | 7,43E-01 | 8,95E-01 |
| <i>ESR2</i>     | Other evidence (Suppl. Table 1) | 1,01  | 7,69E-01 | 9,08E-01 |
| <i>TIMP2</i>    | Other evidence (Suppl. Table 1) | -1,02 | 8,19E-01 | 9,28E-01 |
| <i>PR</i>       | Other evidence (Suppl. Table 1) | -1,03 | 8,34E-01 | 9,34E-01 |
| <i>NEB</i>      | Other evidence (Suppl. Table 1) | 1,02  | 8,56E-01 | 9,44E-01 |
| <i>AHNAK</i>    | Other evidence (Suppl. Table 1) | -1,01 | 8,93E-01 | 9,60E-01 |
| <i>MMP8</i>     | Other evidence (Suppl. Table 1) | 1,00  | 9,40E-01 | 9,78E-01 |
| <i>CDH1</i>     | Other evidence (Suppl. Table 1) | -1,01 | 9,52E-01 | 9,82E-01 |
| <i>GSTP1</i>    | Other evidence (Suppl. Table 1) | 1,00  | 9,62E-01 | 9,86E-01 |
| <i>GGCT</i>     | Other evidence (Suppl. Table 1) | 1,00  | 9,85E-01 | 9,95E-01 |
| <i>BMP1</i>     | Other evidence (Suppl. Table 1) | 1,00  | 9,92E-01 | 9,98E-01 |
